# Supplementary material for: Marine radiocarbon reservoir age simulations for the past 50,000 years revisited
Source: Research Square preprint supplement (doi:10.21203/rs.3.rs-8180274/v1), 2026-01-28
Supplement: Supplementary file 1 [file 2551f0fcafeb4a7c3869095f.pdf]

# **Marine radiocarbon reservoir age simulations for the past 50,000 years revisited**

*Manuscript submitted for publication in Communications Earth & Environment, November 2025*

M. Butzin<sup>1,2\*</sup>, F. Adolphi<sup>2,3</sup>, and G. Lohmann<sup>1,2</sup>

<sup>1</sup>University of Bremen, MARUM - Center for Marine Environmental Sciences, Bremen, Germany

<sup>2</sup>Alfred Wegener Institute, Helmholtz Center for Polar and Marine Research, Bremerhaven, Germany

<sup>3</sup>Faculty of Geosciences, University of Bremen, Bremen, Germany

Corresponding author: Martin Butzin (martin.butzin@awi.de)

\*Now at Alfred Wegener Institute, Helmholtz Center for Polar and Marine Research, Bremerhaven, Germany

## **Supplementary Figures S1 – S3**

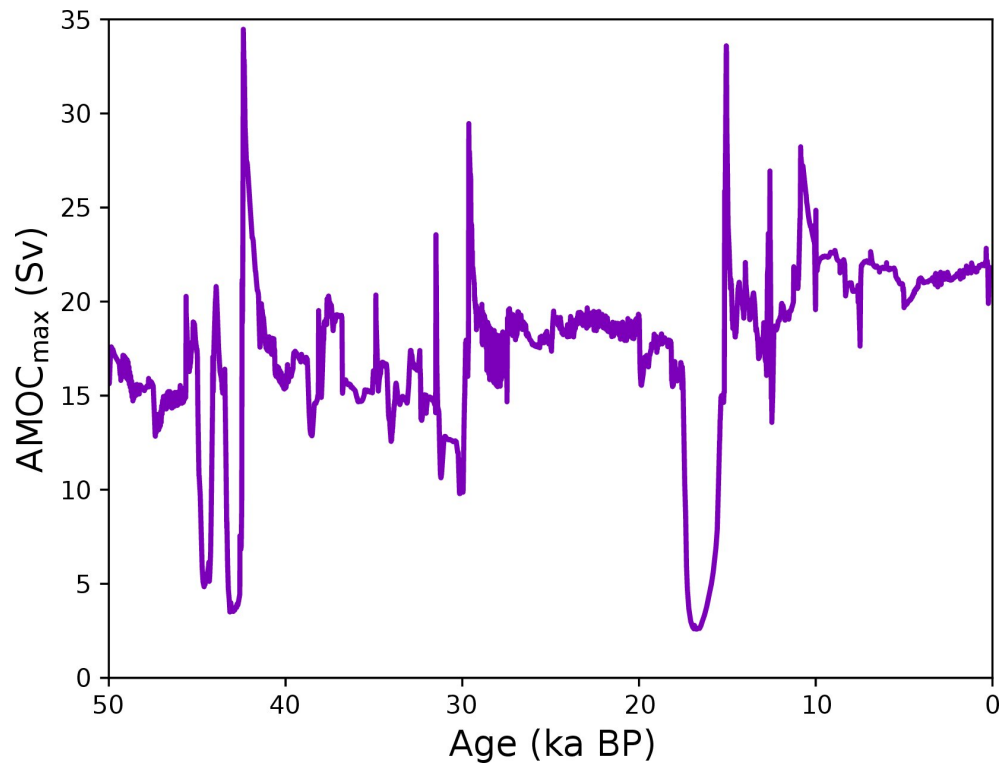

20

21 **Figure S1. Time series of the meridional overturning circulation in the Atlantic (AMOC).** Shown  
 22 is the maximum of the meridional streamfunction northward of 30°S below 700 m simulated by  
 23 CLIMBER-X in this study. The long-term average is 17 Sv with a standard deviation of 4 Sv. Most  
 24 of the AMOC oscillations are unrelated to real Heinrich or Dansgaard-Oeschger events. Except  
 25 for Heinrich event H1 (15.0 - 7.5 ka BP), these events are not captured by the PaleoMIST  
 26 reconstruction which has a temporal resolution of 2500 years while CLIMBER-X considers  
 27 interpolated values in between.

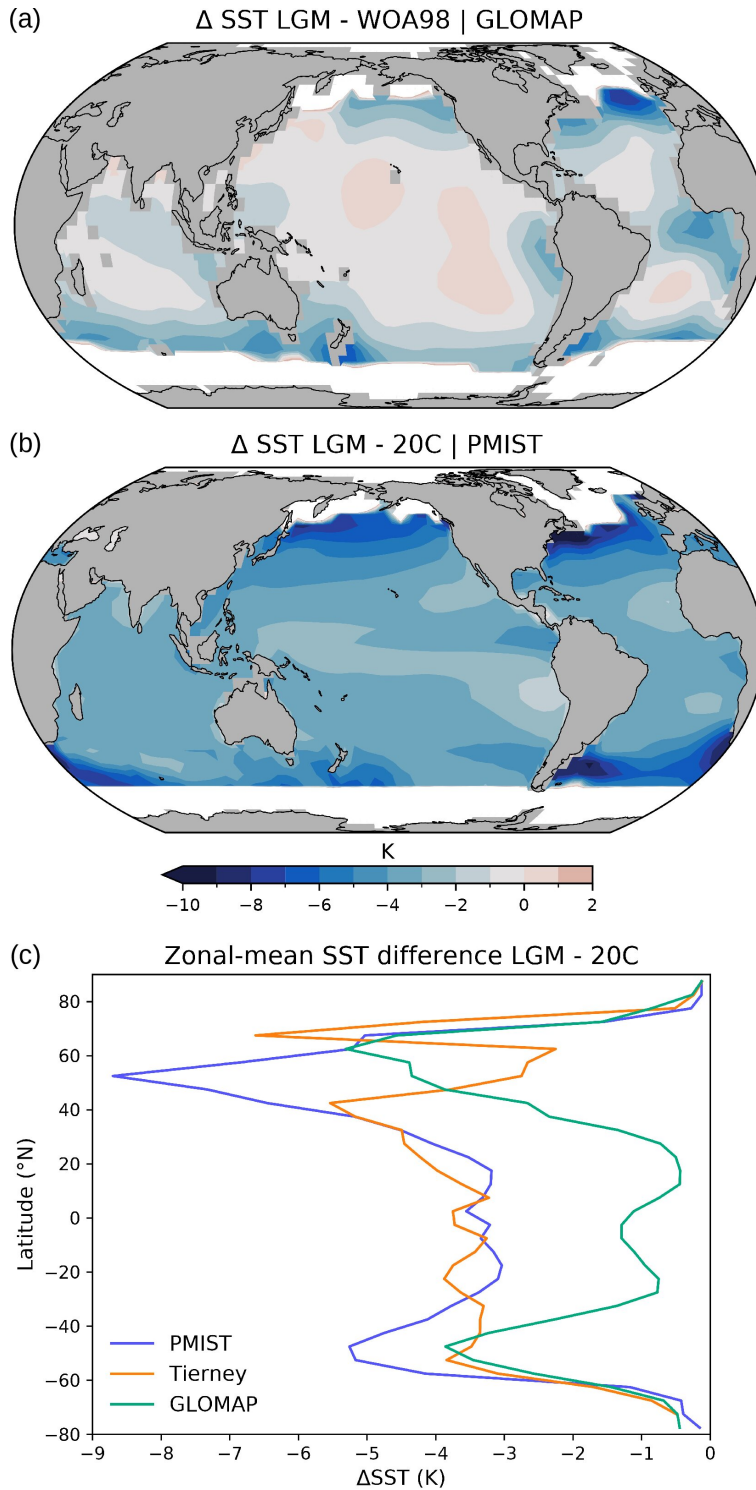

**Figure S2. Annual-mean sea surface temperature differences ( $\Delta$ SST) between the Last Glacial Maximum (LGM, 19 - 23 ka BP) and the 20<sup>th</sup> century (20C).** (a): GLOMAP reconstruction (Paul et al., 2021), reference temperatures are from World Ocean Atlas 1998 (WOA 1998; Levitus, 2012). (b): This study. White areas in the top and middle panel indicate the annual-mean maximum sea ice extent at the LGM. (c): Zonally averaged  $\Delta$ SST values, blue curve: this study. Different to the original publication considering the reference period 0 - 4 cal ka BP,  $\Delta$ SST values by Tierney et al. (2020) have been recalculated relative to WOA 1998 for direct comparison with GLOMAP values. SST and sea ice reconstructions have been remapped to the spatial resolution of CLIMBER-X.

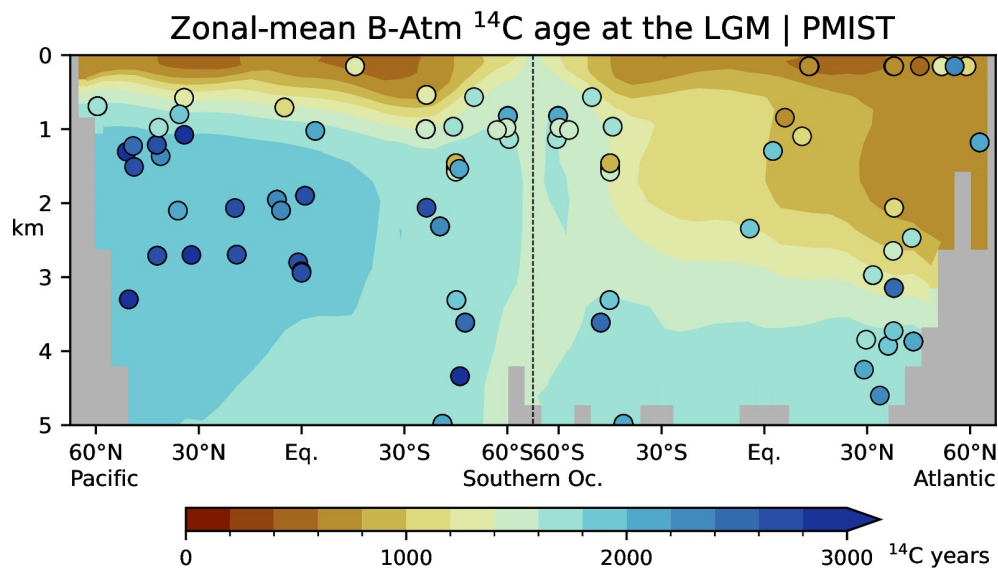

**Figure S3. Simulated and reconstructed benthic-atmospheric  $^{14}\text{C}$  ages during the Last Glacial Maximum.** Shown are values in the Atlantic and Pacific. Shaded areas are zonal-mean results averaged over 19.0 - 21.8 ka BP (this study). Dots are observations between 19.0 and 21.8 ka (compiled by Skinner et al., 2023; see further references therein).

### Supplementary References

- Levitus, S., 2012. NODC Standard Product: World Ocean Atlas 1998 (7 disc set). (NCEI Accession 0095184). Temperature. NOAA National Centers for Environmental Information. Dataset. Accessed 17 November 2025
- Paul, A., Mulitza, S., Stein, R., Werner, M., 2021. A global climatology of the ocean surface during the Last Glacial Maximum mapped on a regular grid (GLOMAP). *Climate of the Past* 17, 805–824. <https://doi.org/10.5194/cp-17-805-2021>
- Skinner, L., Primeau, F., Jeltsch-Thömmes, A., Joos, F., Köhler, P., Bard, E., 2023. Rejuvenating the ocean: mean ocean radiocarbon,  $\text{CO}_2$  release, and radiocarbon budget closure across the last deglaciation. *Climate of the Past* 19, 2177–2202. <https://doi.org/10.5194/cp-19-2177-2023>
- Tierney, J.E., Zhu, J., King, J., Malevich, S.B., Hakim, G.J., Poulsen, C.J., 2020. Glacial cooling and climate sensitivity revisited. *Nature* 584, 569–573. <https://doi.org/10.1038/s41586-020-2617-x>
